# Supplementary material for: Hospital Strain During the COVID-19 Pandemic and Outcomes in Older Racial and Ethnic Minority Adults
Source: PubMed Central journal article supplement (PMC11581618; doi:10.1001/jamanetworkopen.2024.38563), 2024-10-15
Supplement: jamanetwopen-e2438563-s001.pdf [file jamanetwopen-e2438563-s001.pdf]

## Supplemental Online Content

Glance LG, Joynt Maddox KE, Stone PW, et al. Hospital strain during the COVID-19 pandemic and outcomes in older racial and ethnic minority adults. *JAMA Netw Open*. 2024;7(10):e2438563.  
doi:10.1001/jamanetworkopen.2024.38563

**eFigure 1.** Changes in Mortality or Major Morbidity in Patients With Sepsis as a Function of the Weekly Hospital COVID-19 Burden; This Sensitivity Analysis Excludes Patients With COVID-19

**eFigure 2.** Changes in Mortality in Patients With Sepsis as a Function of the Weekly Hospital COVID-19 Burden; This Sensitivity Analysis Excludes Patients With COVID-19

**eFigure 3.** Changes in Mortality or Major Morbidity in Patients With Sepsis as a Function of the Weekly Hospital COVID-19 Burden; This Sensitivity Analysis Excludes Patients Admitted Between February and June 2020

**eFigure 4.** Changes in Mortality in Patients With Sepsis as a Function of the Weekly Hospital COVID-19 Burden; This Sensitivity Analysis Excludes Patients Admitted Between February and June 2020

**eTable 1.** *ICD-10-CM* Diagnostic Codes

**eTable 2.** Hospital Characteristics

**eTable 3.** All-Cause 30-Day Mortality and Major Complications

This supplemental material has been provided by the authors to give readers additional information about their work.

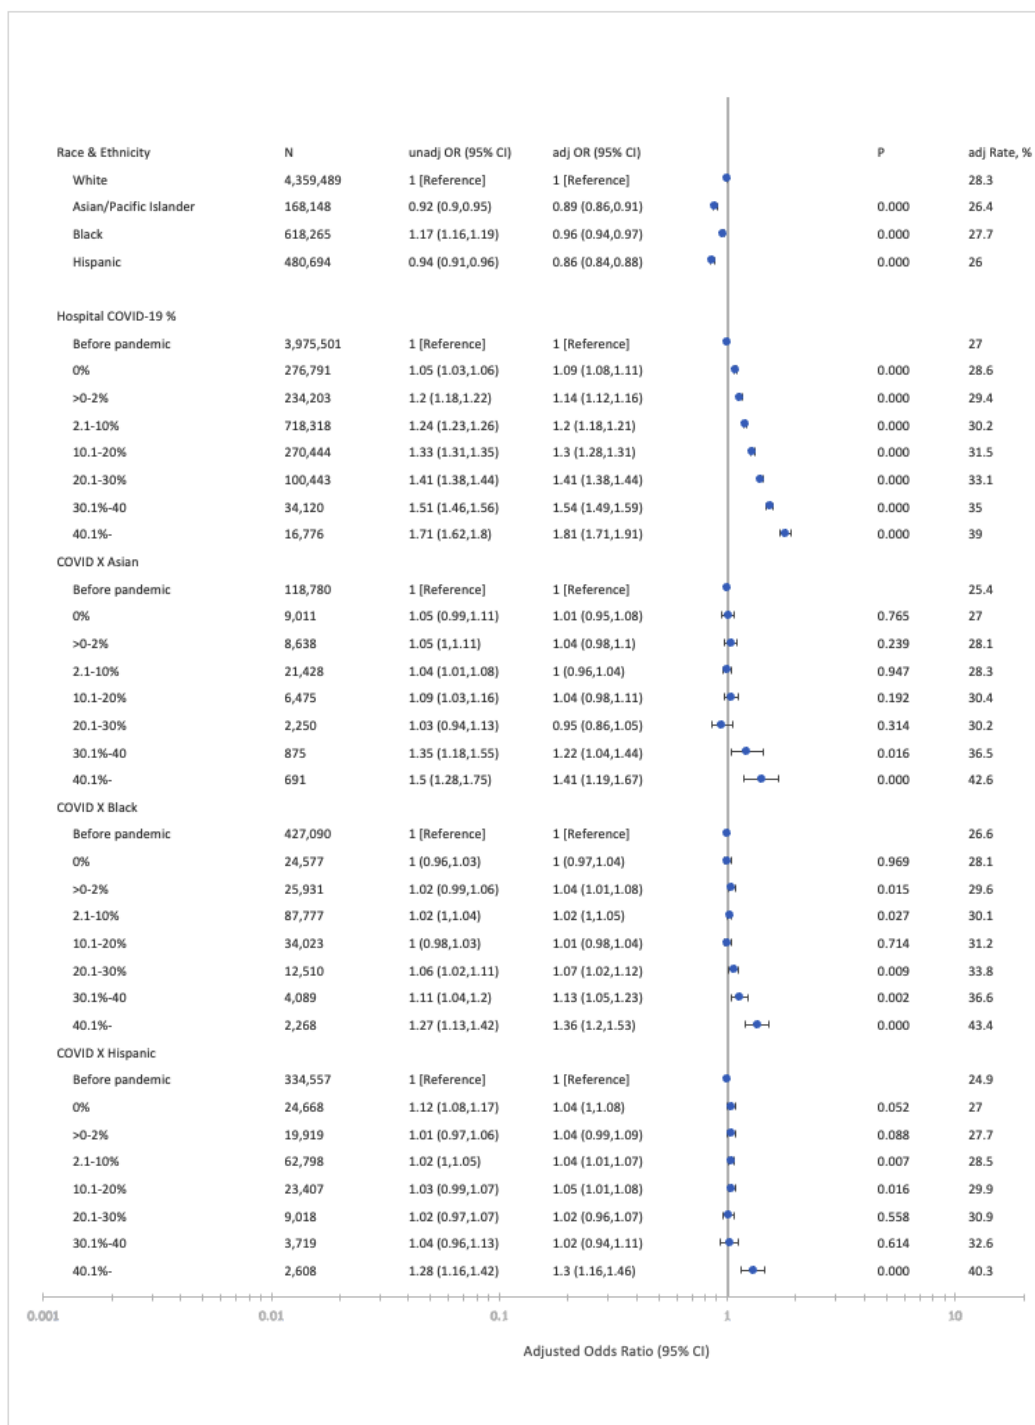

**Supplement Figure 1. Changes in Mortality or Major Morbidity in Patients With Sepsis as a Function of the Weekly Hospital COVID-19 Burden. This sensitivity analysis excludes patients with COVID-19.**

The model was adjusted for patient demographics, payer status, site of origin, frailty, COVID-19, dialysis, prior procedures, comorbidities, hospital characteristics, and time trends. The *unadjusted model* was adjusted for patient demographics, payer status, site of origin, and time trends.

The *Hospital COVID-19 %* odds ratios quantifies the association between the outcome and the hospital COVID-19 burden for White individuals. The interaction term *COVID x Black* odds ratios quantifies the additional effect of the hospital COVID-19 burden for Black individuals compared to White individuals. The other interaction terms are interpreted in a similar fashion.

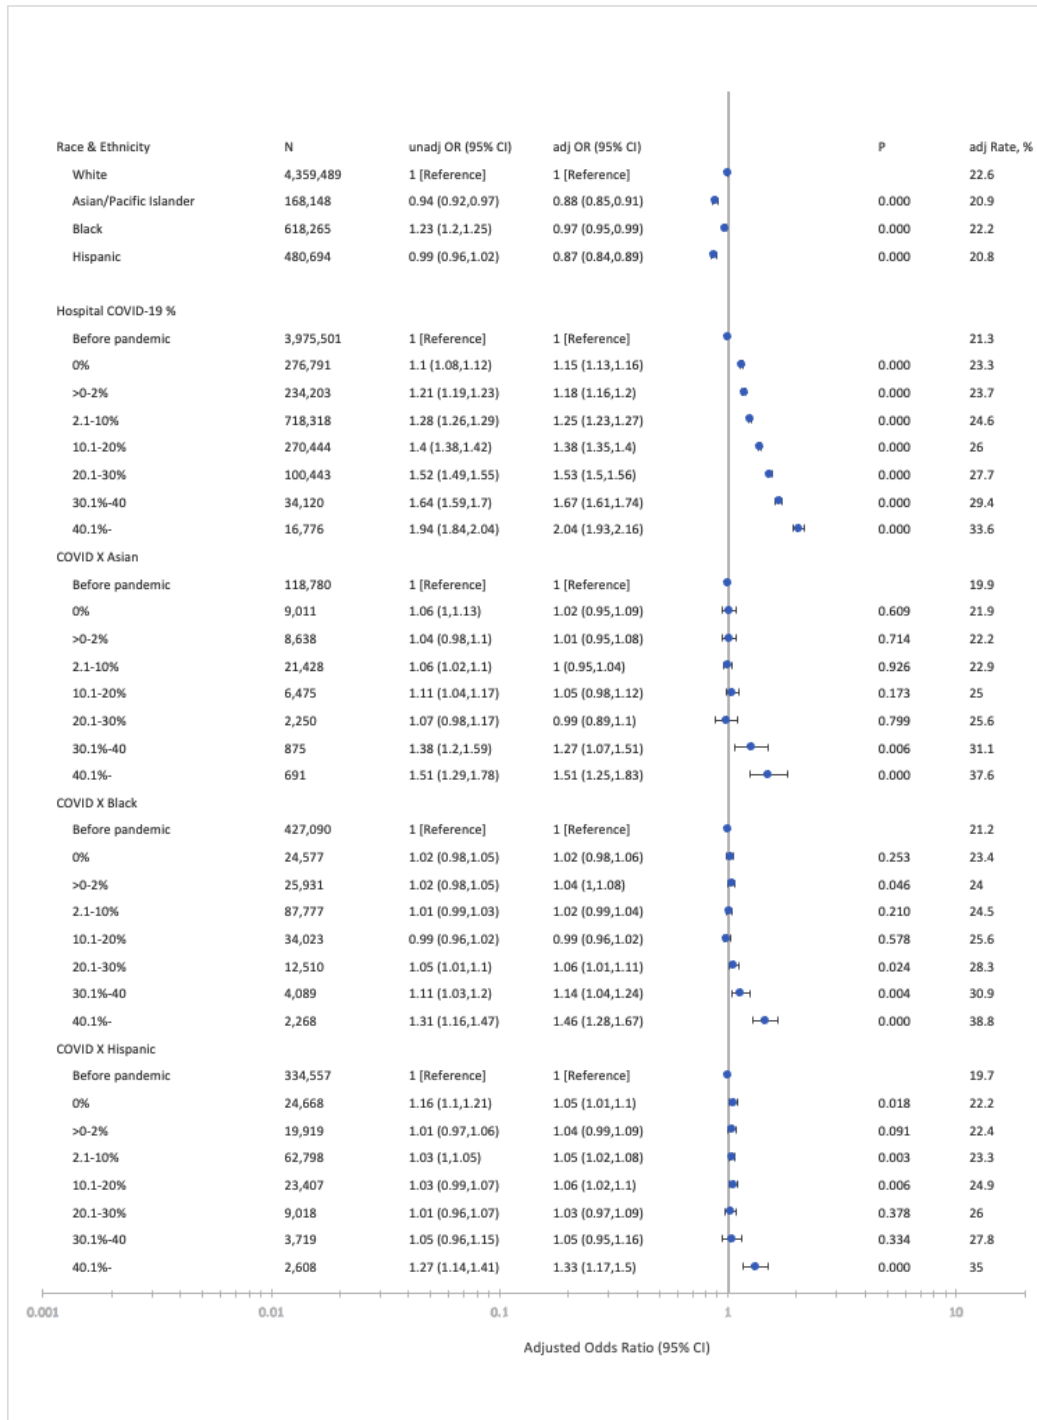

**Supplement Figure 2. Changes in Mortality in Patients With Sepsis as a Function of the Weekly Hospital COVID-19 Burden. This sensitivity analysis excludes patients with COVID-19.**

The model was adjusted for patient demographics, payer status, site of origin, frailty, COVID-19, dialysis, prior procedures, comorbidities, hospital characteristics, and time trends. The *unadjusted model* was adjusted for patient demographics, payer status, site of origin, and time trends.

The *Hospital COVID-19 %* odds ratios quantifies the association between the outcome and the hospital COVID-19 burden for White individuals. The interaction term *COVID x Black* odd ratios quantifies the additional effect of the hospital COVID-19 burden for Black individuals compared to White individuals. The other interaction terms are interpreted in a similar fashion.

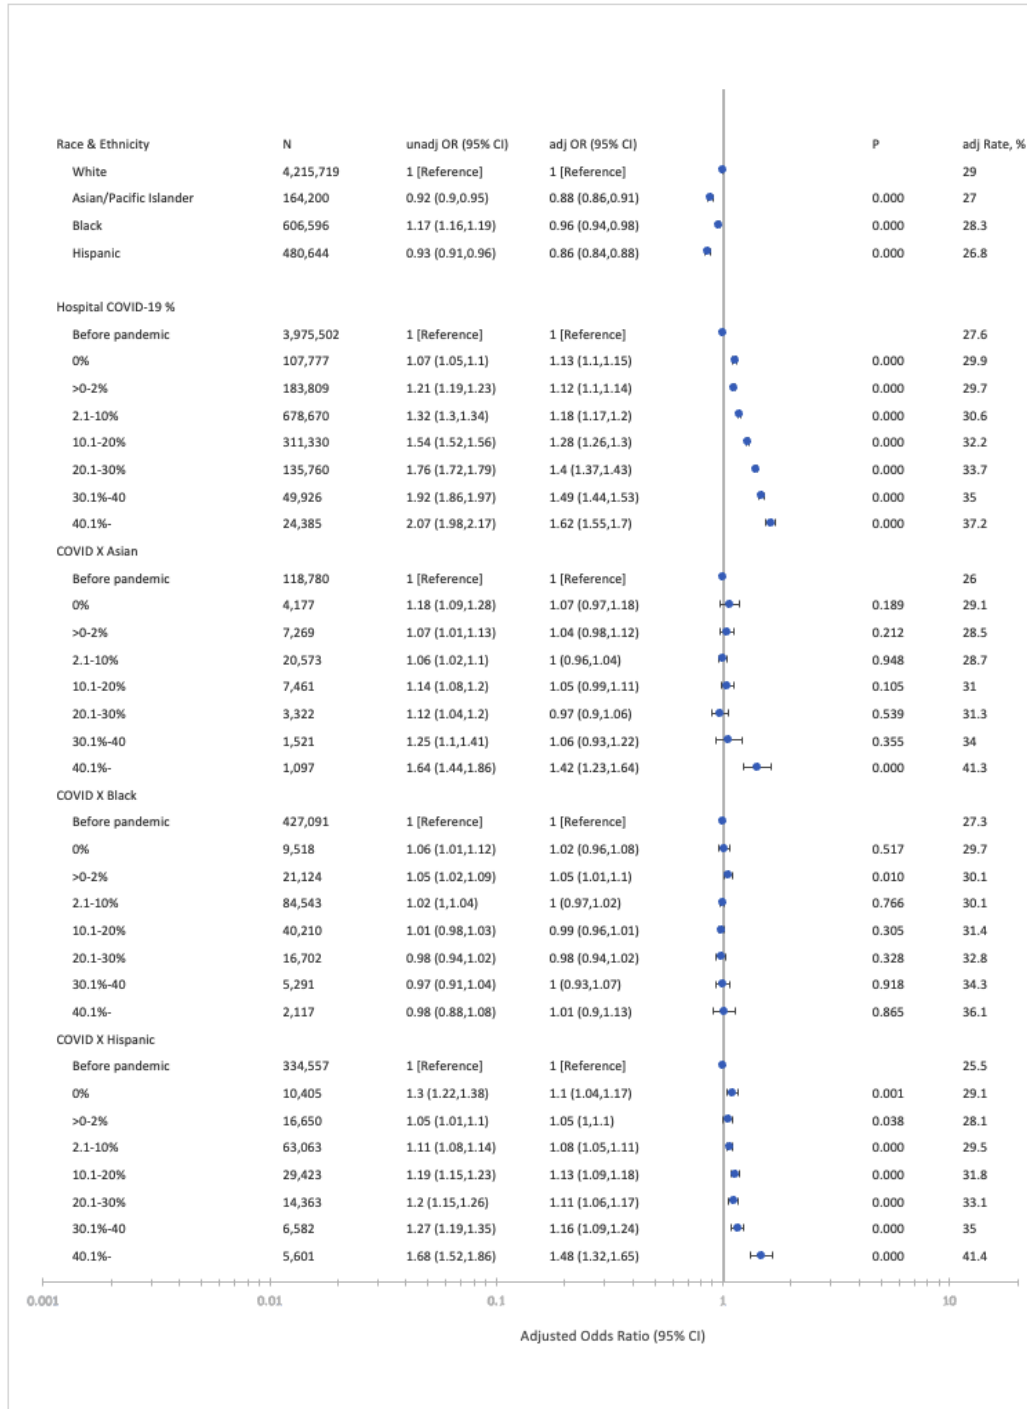

**Supplement Figure 3. Changes in Mortality or Major Morbidity in Patients With Sepsis As a Function of the Weekly Hospital COVID-19 Burden. This sensitivity analysis excludes patients admitted between February and June, 2020.**

The model was adjusted for patient demographics, payer status, site of origin, frailty, COVID-19, dialysis, prior procedures, comorbidities, hospital characteristics, and time trends. The *unadjusted model* was adjusted for patient demographics, payer status, site of origin, and time trends.

The *Hospital COVID-19 %* odds ratios quantifies the association between the outcome and the hospital COVID-19 burden for White individuals. The interaction term *COVID x Black* odd ratios quantifies the additional effect of the hospital COVID-19 burden for Black individuals compared to White individuals. The other interaction terms are interpreted in a similar fashion.

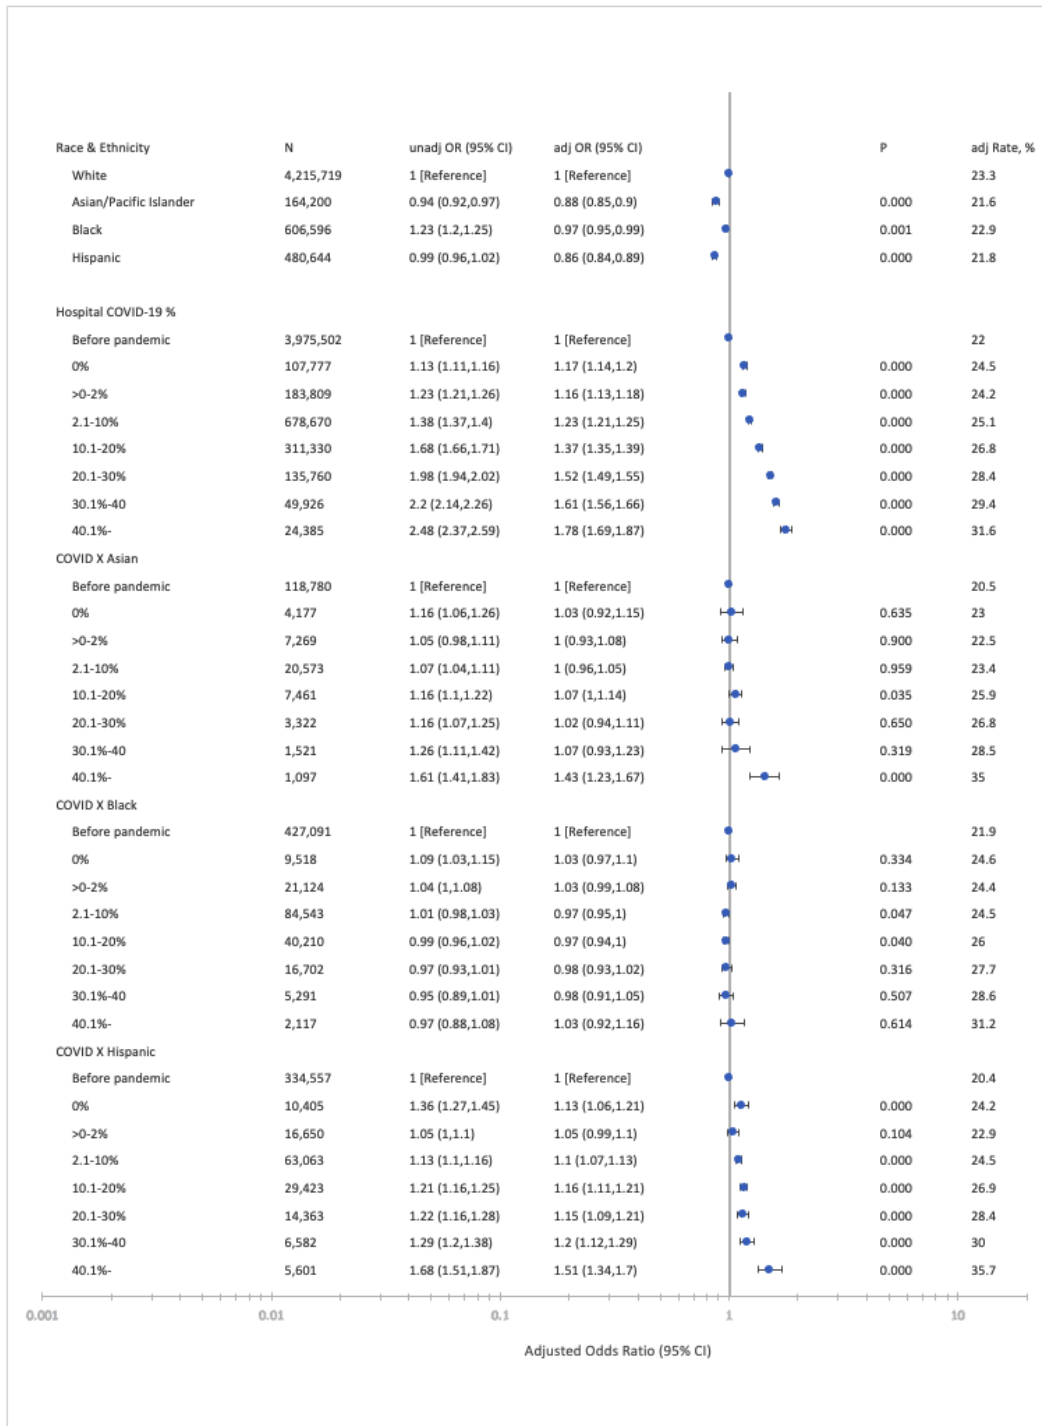

**Supplement Figure 4. Changes in Mortality in Patients With Sepsis As a Function of the Weekly Hospital COVID-19 Burden. This sensitivity analysis excludes patients admitted between February and June, 2020.**

The model was adjusted for patient demographics, payer status, site of origin, frailty, COVID-19, dialysis, prior procedures, comorbidities, hospital characteristics, and time trends. The *unadjusted model* was adjusted for patient demographics, payer status, site of origin, and time trends.

The *Hospital COVID-19 %* odds ratios quantifies the association between the outcome and the hospital COVID-19 burden for White individuals. The interaction term *COVID x Black* odd ratios quantifies the additional effect of the hospital COVID-19 burden for Black individuals compared to White individuals. The other interaction terms are interpreted in a similar fashion.

| <b>Supplement Table 1. ICD-10-CM codes used to identify patient characteristics.</b> |                                                                                                             |
|--------------------------------------------------------------------------------------|-------------------------------------------------------------------------------------------------------------|
| <b>Sepsis</b>                                                                        |                                                                                                             |
|                                                                                      | A02.1; A20.7; A21.7; A22.7; A24.1; A26.7; A28.2; A32.7; A39.4; A40; A41; A42.7; A54.86; B00.7; B37.7; R65.2 |
| <b>Complications</b>                                                                 |                                                                                                             |
| Acute myocardial infarction                                                          | I21; I22                                                                                                    |
| Congestive heart failure                                                             | I50                                                                                                         |
| Acute renal failure                                                                  | N17                                                                                                         |
| Stroke                                                                               | I60; I61; I62; I63; I69                                                                                     |
| Respiratory failure                                                                  | J96.0; J96.2; J96.9                                                                                         |
| <b>Frailty</b>                                                                       |                                                                                                             |
| Wheel-chair                                                                          | Z99.3                                                                                                       |
| Supplemental oxygen                                                                  | Z99.81                                                                                                      |
| Dependent on provider                                                                | Z74                                                                                                         |
| History of falls                                                                     | W00, W01, W02, W04, W05, W06, W07, W08, W09, W10, W11, W12, W13, W14, W15, W16, W17, W18, W19               |
| Fecal incontinence                                                                   | R15                                                                                                         |
| <b>Pre-existing Conditions</b>                                                       |                                                                                                             |
| <b>Shock</b>                                                                         |                                                                                                             |
| <b>Myocardial infarction</b>                                                         |                                                                                                             |
| Prior ST-segment elevation MI                                                        | I210; I220; I211; I221; I212; I228; I213; I229                                                              |
| Prior Non-ST-segment elevation MI                                                    | I214; I222                                                                                                  |
| Prior other MI                                                                       | I219; I21A                                                                                                  |
| <b>Congestive heart failure</b>                                                      |                                                                                                             |
| Systolic CHF                                                                         | I502                                                                                                        |
| Diastolic CHF                                                                        | I503                                                                                                        |
| Systolic and diastolic CHF                                                           | I504                                                                                                        |
| Unspecified CHF                                                                      | I501; I509; I5089                                                                                           |
| <b>Pulmonary</b>                                                                     |                                                                                                             |
| Acute respiratory distress syndrome                                                  | J80                                                                                                         |
| Pulmonary edema                                                                      | J81                                                                                                         |
| Pulmonary interstitial disease                                                       | J84                                                                                                         |
| Acute respiratory failure                                                            | J960                                                                                                        |
| Acute on chronic respiratory failure                                                 | J962                                                                                                        |
| Respiratory failure, unspecified                                                     | J969                                                                                                        |
| COVID-19                                                                             | U071                                                                                                        |
| <b>Prior procedures</b>                                                              |                                                                                                             |
| PCI                                                                                  | Z9861; Z955                                                                                                 |
| CABG                                                                                 | Z951                                                                                                        |
| Heart valve surgery                                                                  | Z952; Z953; Z954                                                                                            |
| Left ventricular assist device                                                       | Z95811                                                                                                      |
| Kidney transplant                                                                    | Z940                                                                                                        |
| Heart transplant                                                                     | Z941                                                                                                        |
| Liver transplant                                                                     | Z944                                                                                                        |



| <b>Supplement Table 2. Hospital Characteristics.</b> |                    |
|------------------------------------------------------|--------------------|
| Characteristics                                      | Hospitals, No. (%) |
| <b>Total number of beds</b>                          |                    |
| <50                                                  | 547 (17)           |
| 51-149                                               | 1,140 (35.5)       |
| 150-249                                              | 651 (20.3)         |
| 250-499                                              | 651 (20.3)         |
| 500-                                                 | 221 (6.9)          |
| <b>Average daily census</b>                          |                    |
| <20                                                  | 719 (22.4)         |
| 21-50                                                | 604 (18.8)         |
| 51-150                                               | 1,046 (32.6)       |
| 151-300                                              | 555 (17.3)         |
| 301-                                                 | 286 (8.9)          |
| <b>Disproportionate share percentage (DSH)</b>       |                    |
| 0-9.9%                                               | 250 (7.8)          |
| 10.0-24.9%                                           | 1,098 (34.2)       |
| 25.0-49.9%                                           | 1,517 (47.3)       |
| 50.0%-                                               | 345 (10.8)         |
| <b>Resident-to-bed ratio</b>                         |                    |
| 0                                                    | 2,103 (65.5)       |
| >0-0.10                                              | 519 (16.2)         |
| 0.11-0.20                                            | 203 (6.3)          |
| 0.21-0.40                                            | 202 (6.3)          |
| 0.41-                                                | 183 (5.7)          |
| <b>ECMO availability</b>                             | 323 (10.1)         |
| <b>Region</b>                                        |                    |
| New England                                          | 132 (4.1)          |
| Middle Atlantic                                      | 352 (11)           |
| South Atlantic                                       | 534 (16.6)         |
| East North Central                                   | 437 (13.6)         |
| East South Central                                   | 350 (10.9)         |
| West North Central                                   | 256 (8)            |
| West South Central                                   | 486 (15.1)         |
| Mountain                                             | 222 (6.9)          |
| Pacific                                              | 391 (12.2)         |
| Puerto Rico                                          | 50 (1.6)           |

**Supplement Table 3. 30-day Mortality and Morbidity**

|                                                   | Unadjusted        |       | Patient Characteristics |       | Patient and Hospital Characteristics |       |
|---------------------------------------------------|-------------------|-------|-------------------------|-------|--------------------------------------|-------|
|                                                   | OR (95% CI)       | P     | OR (95% CI)             | P     | OR (95% CI)                          | P     |
| <b>Race</b>                                       |                   |       |                         |       |                                      |       |
| White                                             | reference         |       | reference               |       | reference                            |       |
| Asian/Pacific Islander                            | 0.92 (0.89, 0.94) | 0.000 | 0.81 (0.78, 0.83)       | 0.000 | 0.89 (0.86, 0.91)                    | 0.000 |
| Black                                             | 1.17 (1.16, 1.19) | 0.000 | 1 (0.98, 1.01)          | 0.689 | 0.96 (0.95, 0.98)                    | 0.000 |
| Hispanic                                          | 0.93 (0.91, 0.96) | 0.000 | 0.87 (0.85, 0.9)        | 0.000 | 0.86 (0.84, 0.88)                    | 0.000 |
| <b>Hospital weekly COVID-19 burden (%)</b>        |                   |       |                         |       |                                      |       |
| Before pandemic                                   | reference         |       | reference               |       | reference                            |       |
| 0%                                                | 1.07 (1.05, 1.08) | 0.000 | 1.08 (1.06, 1.09)       | 0.000 | 1.1 (1.08, 1.11)                     | 0.000 |
| 0.1-2.0%                                          | 1.24 (1.22, 1.26) | 0.000 | 1.13 (1.11, 1.15)       | 0.000 | 1.14 (1.12, 1.15)                    | 0.000 |
| 2.1-10.0%                                         | 1.34 (1.33, 1.36) | 0.000 | 1.2 (1.18, 1.21)        | 0.000 | 1.19 (1.18, 1.21)                    | 0.000 |
| 10.1-20.0%                                        | 1.58 (1.56, 1.6)  | 0.000 | 1.31 (1.29, 1.33)       | 0.000 | 1.3 (1.28, 1.32)                     | 0.000 |
| 20.1-30.0%                                        | 1.82 (1.79, 1.85) | 0.000 | 1.44 (1.41, 1.46)       | 0.000 | 1.43 (1.4, 1.45)                     | 0.000 |
| 30.1-40.0%                                        | 2.04 (1.99, 2.1)  | 0.000 | 1.55 (1.51, 1.6)        | 0.000 | 1.55 (1.51, 1.6)                     | 0.000 |
| 40.1%-                                            | 2.57 (2.44, 2.71) | 0.000 | 1.86 (1.76, 1.97)       | 0.000 | 1.9 (1.8, 2)                         | 0.000 |
| <b>Hospital COVID-19 X Asian/Pacific Islander</b> |                   |       |                         |       |                                      |       |
| Before pandemic                                   | reference         |       | reference               |       | reference                            |       |
| 0%                                                | 1.05 (1, 1.12)    | 0.073 | 1 (0.94, 1.06)          | 0.935 | 1.01 (0.95, 1.08)                    | 0.745 |
| >0-2%                                             | 1.06 (1.01, 1.12) | 0.017 | 1.04 (0.98, 1.11)       | 0.204 | 1.04 (0.98, 1.11)                    | 0.176 |
| 2.1-10%                                           | 1.08 (1.05, 1.12) | 0.000 | 1.02 (0.98, 1.06)       | 0.331 | 1.01 (0.97, 1.05)                    | 0.606 |
| 10.1-20%                                          | 1.15 (1.1, 1.21)  | 0.000 | 1.07 (1.01, 1.13)       | 0.018 | 1.05 (0.99, 1.11)                    | 0.098 |
| 20.1-30%                                          | 1.2 (1.11, 1.28)  | 0.000 | 1.08 (1, 1.16)          | 0.059 | 1.03 (0.96, 1.12)                    | 0.377 |
| 30.1%-40                                          | 1.27 (1.14, 1.41) | 0.000 | 1.12 (1, 1.26)          | 0.044 | 1.1 (0.97, 1.23)                     | 0.125 |
| 40.1%-                                            | 1.6 (1.45, 1.78)  | 0.000 | 1.49 (1.33, 1.68)       | 0.000 | 1.44 (1.28, 1.61)                    | 0.000 |
| <b>Hospital COVID-19 X Black</b>                  |                   |       |                         |       |                                      |       |
| Before pandemic                                   | reference         |       | reference               |       | reference                            |       |
| 0%                                                | 1.01 (0.97, 1.04) | 0.746 | 1 (0.97, 1.04)          | 0.99  | 1 (0.96, 1.03)                       | 0.939 |
| >0-2%                                             | 1.04 (1.01, 1.07) | 0.021 | 1.02 (0.99, 1.06)       | 0.218 | 1.03 (1, 1.07)                       | 0.056 |
| 2.1-10%                                           | 1.04 (1.02, 1.06) | 0.000 | 1 (0.98, 1.02)          | 0.905 | 1.01 (0.99, 1.03)                    | 0.519 |
| 10.1-20%                                          | 1.02 (0.99, 1.04) | 0.142 | 0.98 (0.96, 1.01)       | 0.186 | 0.99 (0.96, 1.01)                    | 0.320 |
| 20.1-30%                                          | 1.01 (0.98, 1.05) | 0.420 | 0.99 (0.95, 1.03)       | 0.589 | 0.99 (0.95, 1.03)                    | 0.712 |
| 30.1%-40                                          | 1.05 (0.99, 1.11) | 0.139 | 1.05 (0.98, 1.11)       | 0.173 | 1.05 (0.99, 1.12)                    | 0.131 |
| 40.1%-                                            | 1.2 (1.1, 1.31)   | 0.000 | 1.2 (1.09, 1.31)        | 0.000 | 1.21 (1.11, 1.33)                    | 0.000 |
| <b>Hospital COVID-19 X Hispanic</b>               |                   |       |                         |       |                                      |       |
| Before pandemic                                   | reference         |       | reference               |       | reference                            |       |
| 0%                                                | 1.15 (1.1, 1.2)   | 0.006 | 1.15 (1.1, 1.2)         | 0.000 | 1.05 (1.01, 1.1)                     | 0.010 |
| >0-2%                                             | 1.06 (1.02, 1.11) | 0.000 | 1.05 (1.01, 1.1)        | 0.020 | 1.06 (1.02, 1.11)                    | 0.008 |
| 2.1-10%                                           | 1.12 (1.1, 1.15)  | 0.000 | 1.06 (1.03, 1.09)       | 0.000 | 1.08 (1.05, 1.11)                    | 0.000 |
| 10.1-20%                                          | 1.2 (1.16, 1.24)  | 0.000 | 1.09 (1.05, 1.13)       | 0.000 | 1.13 (1.09, 1.17)                    | 0.000 |
| 20.1-30%                                          | 1.21 (1.16, 1.26) | 0.000 | 1.07 (1.02, 1.12)       | 0.010 | 1.12 (1.07, 1.17)                    | 0.000 |
| 30.1%-40                                          | 1.28 (1.2, 1.36)  | 0.000 | 1.11 (1.04, 1.19)       | 0.001 | 1.17 (1.1, 1.24)                     | 0.000 |
| 40.1%-                                            | 1.6 (1.47, 1.75)  | 0.000 | 1.38 (1.26, 1.52)       | 0.000 | 1.45 (1.32, 1.59)                    | 0.000 |
| <b>Age</b>                                        |                   |       |                         |       |                                      |       |
| 65-69                                             | reference         |       | reference               |       | reference                            |       |
| 70-74                                             | 1.02 (1.02, 1.03) | 0.000 | 1.11 (1.11, 1.12)       | 0.000 | 1.11 (1.1, 1.12)                     | 0.000 |
| 75-79                                             | 1.16 (1.15, 1.17) | 0.000 | 1.27 (1.26, 1.28)       | 0.000 | 1.27 (1.26, 1.28)                    | 0.000 |
| 80-84                                             | 1.34 (1.33, 1.35) | 0.000 | 1.5 (1.49, 1.51)        | 0.000 | 1.5 (1.49, 1.51)                     | 0.000 |
| 85-89                                             | 1.6 (1.58, 1.61)  | 0.000 | 1.82 (1.8, 1.83)        | 0.000 | 1.82 (1.81, 1.84)                    | 0.000 |
| 90-94                                             | 1.94 (1.92, 1.96) | 0.000 | 2.27 (2.25, 2.3)        | 0.000 | 2.29 (2.27, 2.32)                    | 0.000 |
| 95-                                               | 2.46 (2.43, 2.49) | 0.000 | 2.96 (2.92, 3)          | 0.000 | 3 (2.96, 3.04)                       | 0.000 |
| <b>Sex</b>                                        |                   |       |                         |       |                                      |       |
| Male                                              | reference         |       | reference               |       | reference                            |       |
| Female                                            | 0.91 (0.9, 0.91)  | 0.000 | 0.98 (0.98, 0.99)       | 0.000 | 0.98 (0.98, 0.98)                    | 0.000 |



| Supplement Table 3. 30-day Mortality and Morbidity |                  |       |                         |       |                                      |       |
|----------------------------------------------------|------------------|-------|-------------------------|-------|--------------------------------------|-------|
|                                                    | Unadjusted       |       | Patient Characteristics |       | Patient and Hospital Characteristics |       |
|                                                    | OR (95% CI)      | P     | OR (95% CI)             | P     | OR (95% CI)                          | P     |
| <b>Admission source</b>                            |                  |       |                         |       |                                      |       |
| Community                                          | reference        |       | reference               |       | reference                            |       |
| Hospital                                           | 1.76 (1.72 ,1.8) | 0.000 | 1.3 (1.28 ,1.33)        | 0.000 | 1.31 (1.29 ,1.34)                    | 0.000 |
| SNF/Nursing Home                                   | 1.73 (1.7 ,1.77) | 0.000 | 1.44 (1.41 ,1.47)       | 0.000 | 1.45 (1.42 ,1.48)                    | 0.000 |
| Other                                              | 1.5 (1.45 ,1.55) | 0.000 | 1.29 (1.26 ,1.33)       | 0.000 | 1.3 (1.26 ,1.33)                     | 0.000 |
| Dual-eligible                                      | 1 (0.99 ,1.01)   | 0.406 | 0.91 (0.9 ,0.92)        | 0.000 | 0.92 (0.91 ,0.92)                    | 0.000 |
| Medicare Advantage                                 |                  |       | 0.98 (0.97 ,0.99)       | 0.002 | 0.99 (0.98 ,1)                       | 0.040 |
| <b>Functional Status/frailty</b>                   |                  |       |                         |       |                                      |       |
| Malnutrition                                       |                  |       | 1.29 (1.25 ,1.32)       | 0.000 | 1.31 (1.27 ,1.34)                    | 0.000 |
| Senility                                           |                  |       | 1.25 (1.2 ,1.29)        | 0.000 | 1.23 (1.18 ,1.27)                    | 0.000 |
| Cognitive                                          |                  |       | 1.17 (1.15 ,1.18)       | 0.000 | 1.16 (1.15 ,1.18)                    | 0.000 |
| Dependent on provider                              |                  |       | 1.38 (1.35 ,1.41)       | 0.000 | 1.33 (1.3 ,1.35)                     | 0.000 |
| <b>Pre-existing Conditions</b>                     |                  |       |                         |       |                                      |       |
| COVID-19                                           |                  |       | 2.02 (1.99 ,2.06)       | 0.000 | 2.02 (1.99 ,2.06)                    | 0.000 |
| Shock                                              |                  |       | 3.2 (3.17 ,3.23)        | 0.000 | 3.19 (3.16 ,3.22)                    | 0.000 |
| <b>Myocardial infarction</b>                       |                  |       |                         |       |                                      |       |
| No prior myocardial infarction                     |                  |       | reference               |       | reference                            |       |
| Prior ST-segment elevation MI                      |                  |       | 3.52 (3.34 ,3.7)        | 0.000 | 3.51 (3.34 ,3.69)                    | 0.000 |
| Prior Non-ST-segment elevation MI                  |                  |       | 1.61 (1.59 ,1.63)       | 0.000 | 1.6 (1.58 ,1.62)                     | 0.000 |
| Prior other MI                                     |                  |       | 1.17 (1.15 ,1.19)       | 0.000 | 1.18 (1.16 ,1.19)                    | 0.000 |
| <b>Congestive heart failure</b>                    |                  |       |                         |       |                                      |       |
| None                                               |                  |       | reference               |       | reference                            |       |
| Systolic CHF                                       |                  |       | 1.25 (1.24 ,1.26)       | 0.000 | 1.25 (1.24 ,1.26)                    | 0.000 |
| Diastolic CHF                                      |                  |       | 0.99 (0.98 ,1)          | 0.007 | 0.99 (0.98 ,1)                       | 0.014 |
| Systolic and diastolic CHF                         |                  |       | 1.19 (1.18 ,1.21)       | 0.000 | 1.2 (1.18 ,1.22)                     | 0.000 |
| Unspecified CHF                                    |                  |       | 1.29 (1.28 ,1.3)        | 0.000 | 1.28 (1.27 ,1.3)                     | 0.000 |
| <b>Pulmonary</b>                                   |                  |       |                         |       |                                      |       |
| Acute respiratory distress syndrome                |                  |       | 5.63 (5.44 ,5.83)       | 0.000 | 5.7 (5.51 ,5.9)                      | 0.000 |
| Pulmonary edema                                    |                  |       | 1.27 (1.24 ,1.3)        | 0.000 | 1.27 (1.24 ,1.3)                     | 0.000 |
| Pulmonary interstitial disease                     |                  |       | 1.38 (1.36 ,1.41)       | 0.000 | 1.39 (1.37 ,1.42)                    | 0.000 |
| Acute respiratory failure                          |                  |       | 1.76 (1.74 ,1.78)       | 0.000 | 1.77 (1.75 ,1.79)                    | 0.000 |
| Acute on chronic respiratory failure               |                  |       | 1.68 (1.66 ,1.7)        | 0.000 | 1.69 (1.67 ,1.71)                    | 0.000 |
| Respiratory failure, unspecified                   |                  |       | 2.25 (2.19 ,2.31)       | 0.000 | 2.25 (2.2 ,2.31)                     | 0.000 |
| <b>Elixhauser comorbidities</b>                    |                  |       |                         |       |                                      |       |
| Alcohol abuse                                      |                  |       | 1.11 (1.1 ,1.13)        | 0.000 | 1.12 (1.11 ,1.14)                    | 0.000 |
| Lymphoma                                           |                  |       | 1.36 (1.34 ,1.38)       | 0.000 | 1.37 (1.36 ,1.39)                    | 0.000 |
| Leukemia                                           |                  |       | 1.67 (1.65 ,1.7)        | 0.000 | 1.69 (1.66 ,1.72)                    | 0.000 |
| Metastatic cancer                                  |                  |       | 3.64 (3.59 ,3.69)       | 0.000 | 3.68 (3.63 ,3.73)                    | 0.000 |
| Solid tumor                                        |                  |       | 1.58 (1.56 ,1.59)       | 0.000 | 1.58 (1.56 ,1.6)                     | 0.000 |
| Cerebrovascular disease                            |                  |       | 1.19 (1.18 ,1.21)       | 0.000 | 1.2 (1.18 ,1.21)                     | 0.000 |
| Coagulopathy                                       |                  |       | 1.23 (1.22 ,1.24)       | 0.000 | 1.23 (1.22 ,1.24)                    | 0.000 |
| Dementia                                           |                  |       | 1.33 (1.32 ,1.34)       | 0.000 | 1.33 (1.32 ,1.34)                    | 0.000 |
| Liver disease, mild                                |                  |       | 1.14 (1.13 ,1.16)       | 0.000 | 1.15 (1.14 ,1.17)                    | 0.000 |
| Liver disease and failure, moderate to severe      |                  |       | 2.6 (2.56 ,2.65)        | 0.000 | 2.63 (2.59 ,2.68)                    | 0.000 |
| Chronic pulmonary disease                          |                  |       | 0.99 (0.98 ,1)          | 0.001 | 0.99 (0.98 ,0.99)                    | 0.000 |
| Neurologic disorder, other                         |                  |       | 1.32 (1.3 ,1.33)        | 0.000 | 1.32 (1.31 ,1.33)                    | 0.000 |
| Seizures and epilepsy                              |                  |       | 1.01 (0.99 ,1.02)       | 0.348 | 1 (0.99 ,1.01)                       | 0.434 |
| Paralysis                                          |                  |       | 1.02 (1.01 ,1.04)       | 0.001 | 1.03 (1.02 ,1.05)                    | 0.000 |
| Peripheral vascular disease                        |                  |       | 1.06 (1.04 ,1.09)       | 0.000 | 1.1 (1.08 ,1.12)                     | 0.000 |
| Pulmonary circulation disease                      |                  |       | 1.22 (1.21 ,1.23)       | 0.000 | 1.22 (1.21 ,1.24)                    | 0.000 |
| Renal failure, moderate                            |                  |       | 1.13 (1.12 ,1.14)       | 0.000 | 1.14 (1.13 ,1.14)                    | 0.000 |
| Renal failure, severe                              |                  |       | 1.72 (1.71 ,1.74)       | 0.000 | 1.72 (1.7 ,1.74)                     | 0.000 |
| Peptic ulcer disease with bleeding                 |                  |       | 1.16 (1.14 ,1.18)       | 0.000 | 1.17 (1.15 ,1.19)                    | 0.000 |
| Valvular disease                                   |                  |       | 1.13 (1.12 ,1.14)       | 0.000 | 1.13 (1.12 ,1.14)                    | 0.000 |
| Weight loss                                        |                  |       | 1.43 (1.4 ,1.47)        | 0.000 | 1.43 (1.39 ,1.46)                    | 0.000 |
| Dialysis                                           |                  |       | 1.02 (1 ,1.03)          | 0.029 | 1.02 (1 ,1.04)                       | 0.029 |

**Supplement Table 3. 30-day Mortality and Morbidity**

|                                                | Unadjusted  |   | Patient Characteristics |       | Patient and Hospital Characteristics |       |
|------------------------------------------------|-------------|---|-------------------------|-------|--------------------------------------|-------|
|                                                | OR (95% CI) | P | OR (95% CI)             | P     | OR (95% CI)                          | P     |
| <b>Prior procedures</b>                        |             |   |                         |       |                                      |       |
| PCI                                            |             |   | 0.85 (0.85 ,0.86)       | 0.000 | 0.85 (0.84 ,0.86)                    | 0.000 |
| CABG                                           |             |   | 0.98 (0.97 ,0.99)       | 0.000 | 0.97 (0.96 ,0.98)                    | 0.000 |
| Heart valve surgery                            |             |   | 0.86 (0.84 ,0.87)       | 0.000 | 0.86 (0.85 ,0.88)                    | 0.000 |
| Left ventricular assist device                 |             |   | 1.18 (1.02 ,1.35)       | 0.023 | 1.21 (1.05 ,1.4)                     | 0.008 |
| Kidney transplant                              |             |   | 0.65 (0.63 ,0.68)       | 0.000 | 0.67 (0.65 ,0.69)                    | 0.000 |
| Heart transplant                               |             |   | 0.75 (0.68 ,0.82)       | 0.000 | 0.76 (0.7 ,0.83)                     | 0.000 |
| Liver transplant                               |             |   | 0.32 (0.3 ,0.34)        | 0.000 | 0.32 (0.3 ,0.34)                     | 0.000 |
| <b>Hospital characteristics</b>                |             |   |                         |       |                                      |       |
| ECMO availability                              |             |   |                         |       | 0.95 (0.92 ,0.98)                    | 0.000 |
| <b>Bed size</b>                                |             |   |                         |       |                                      |       |
| <= 50                                          |             |   |                         |       | reference                            |       |
| 51-149                                         |             |   |                         |       | 0.97 (0.93 ,1.01)                    | 0.168 |
| 150-249                                        |             |   |                         |       | 1 (0.95 ,1.05)                       | 0.933 |
| 250-499                                        |             |   |                         |       | 1 (0.94 ,1.06)                       | 0.937 |
| 500-                                           |             |   |                         |       | 0.97 (0.9 ,1.04)                     | 0.399 |
| <b>Average daily census</b>                    |             |   |                         |       |                                      |       |
| <=20                                           |             |   |                         |       | reference                            |       |
| 21-50                                          |             |   |                         |       | 1.01 (0.96 ,1.05)                    | 0.717 |
| 51-150                                         |             |   |                         |       | 1.05 (0.99 ,1.1)                     | 0.078 |
| 151-300                                        |             |   |                         |       | 1.07 (1.01 ,1.14)                    | 0.025 |
| 301-                                           |             |   |                         |       | 1.11 (1.03 ,1.19)                    | 0.006 |
| <b>Resident-to-bed ratio</b>                   |             |   |                         |       |                                      |       |
| 0                                              |             |   |                         |       | reference                            |       |
| >0-0.10                                        |             |   |                         |       | 0.97 (0.95 ,1)                       | 0.031 |
| 0.11-0.20                                      |             |   |                         |       | 0.99 (0.96 ,1.02)                    | 0.596 |
| 0.21-0.40                                      |             |   |                         |       | 0.92 (0.89 ,0.95)                    | 0.000 |
| 0.41-                                          |             |   |                         |       | 0.91 (0.87 ,0.95)                    | 0.000 |
| <b>Disproportionate share percentage (DSH)</b> |             |   |                         |       |                                      |       |
| 0-9.9%                                         |             |   |                         |       | reference                            |       |
| 10.0-24.9%                                     |             |   |                         |       | 1.09 (1.05 ,1.14)                    | 0.000 |
| 25.0-49.9%                                     |             |   |                         |       | 1.16 (1.12 ,1.21)                    | 0.000 |
| 50.0%-                                         |             |   |                         |       | 1.16 (1.1 ,1.23)                     | 0.000 |
| <b>Region</b>                                  |             |   |                         |       |                                      |       |
| New England                                    |             |   |                         |       | reference                            |       |
| Middle Atlantic                                |             |   |                         |       | 1.05 (1 ,1.1)                        | 0.055 |
| South Atlantic                                 |             |   |                         |       | 1.07 (1.02 ,1.11)                    | 0.003 |
| East North Central                             |             |   |                         |       | 1.01 (0.96 ,1.05)                    | 0.808 |
| East South Central                             |             |   |                         |       | 1.09 (1.04 ,1.14)                    | 0.000 |
| West North Central                             |             |   |                         |       | 0.95 (0.9 ,1)                        | 0.033 |
| West South Central                             |             |   |                         |       | 0.98 (0.93 ,1.02)                    | 0.300 |
| Mountain                                       |             |   |                         |       | 0.87 (0.82 ,0.91)                    | 0.000 |
| Pacific                                        |             |   |                         |       | 0.8 (0.77 ,0.84)                     | 0.000 |
| Puerto Rico                                    |             |   |                         |       | 3 (2.52 ,3.57)                       | 0.000 |

| Supplement Table 3. 30-day Mortality and Morbidity |                     |       |                         |       |                                      |       |
|----------------------------------------------------|---------------------|-------|-------------------------|-------|--------------------------------------|-------|
|                                                    | Unadjusted          |       | Patient Characteristics |       | Patient and Hospital Characteristics |       |
|                                                    | OR (95% CI)         | P     | OR (95% CI)             | P     | OR (95% CI)                          | P     |
| Time                                               | 0.997 (0.997,0.997) | 0.000 | 0.996 (0.996,0.996)     | 0.000 | 0.996 (0.996,0.996)                  | 0.000 |
| Admission month                                    |                     |       |                         |       |                                      |       |
| January                                            | reference           | 0.000 | reference               |       | reference                            |       |
| February                                           | 0.97 (0.96,0.98)    | 0.000 | 0.98 (0.97,0.99)        | 0.000 | 0.98 (0.97,0.99)                     | 0.000 |
| March                                              | 0.96 (0.95,0.97)    | 0.000 | 0.99 (0.98,1)           | 0.084 | 0.99 (0.98,1)                        | 0.018 |
| April                                              | 0.96 (0.95,0.97)    | 0.000 | 0.97 (0.96,0.98)        | 0.000 | 0.96 (0.95,0.97)                     | 0.000 |
| May                                                | 0.9 (0.9,0.91)      | 0.000 | 0.93 (0.92,0.94)        | 0.000 | 0.93 (0.92,0.94)                     | 0.000 |
| June                                               | 0.88 (0.87,0.89)    | 0.000 | 0.92 (0.92,0.93)        | 0.000 | 0.92 (0.91,0.93)                     | 0.000 |
| July                                               | 0.89 (0.89,0.9)     | 0.000 | 0.94 (0.93,0.95)        | 0.000 | 0.94 (0.93,0.95)                     | 0.000 |
| August                                             | 0.91 (0.9,0.92)     | 0.000 | 0.95 (0.94,0.96)        | 0.000 | 0.95 (0.94,0.96)                     | 0.000 |
| September                                          | 0.92 (0.91,0.93)    | 0.000 | 0.96 (0.95,0.97)        | 0.000 | 0.96 (0.95,0.97)                     | 0.000 |
| October                                            | 0.94 (0.93,0.95)    | 0.000 | 0.98 (0.97,0.99)        | 0.001 | 0.98 (0.97,0.99)                     | 0.000 |
| November                                           | 0.95 (0.94,0.96)    | 0.000 | 0.98 (0.97,0.99)        | 0.000 | 0.98 (0.97,0.99)                     | 0.000 |
| December                                           | 0.92 (0.91,0.93)    | 0.000 | 0.98 (0.97,0.99)        | 0.000 | 0.98 (0.97,0.99)                     | 0.001 |
| Admission day of week                              |                     |       |                         |       |                                      |       |
| Sunday                                             | 0.97 (0.97,0.98)    | 0.000 | 0.99 (0.98,0.99)        | 0.000 | 0.99 (0.98,0.99)                     | 0.000 |
| Monday                                             | reference           |       | reference               |       | reference                            |       |
| Tuesday                                            | 1.03 (1.02,1.04)    | 0.000 | 1.03 (1.02,1.04)        | 0.000 | 1.03 (1.02,1.04)                     | 0.000 |
| Wednesday                                          | 0.99 (0.99,1)       | 0.046 | 1 (0.99,1)              | 0.477 | 1 (0.99,1)                           | 0.403 |
| Thursday                                           | 0.98 (0.97,0.99)    | 0.000 | 0.99 (0.98,0.99)        | 0.001 | 0.99 (0.98,0.99)                     | 0.001 |
| Friday                                             | 0.98 (0.97,0.98)    | 0.000 | 0.99 (0.98,0.99)        | 0.000 | 0.99 (0.98,0.99)                     | 0.000 |
| Saturday                                           | 0.97 (0.96,0.98)    | 0.000 | 0.98 (0.98,0.99)        | 0.000 | 0.98 (0.98,0.99)                     | 0.000 |
