# Supplementary material for: Hospital Strain During the COVID-19 Pandemic and Outcomes in Older Racial and Ethnic Minority Adults
Source: PubMed Central journal article supplement (PMC11581618; doi:10.1001/jamanetworkopen.2024.38563), 2024-10-15
Supplement: jamanetwopen-e2438563-s002.pdf [file jamanetwopen-e2438563-s002.pdf]

## Data Sharing Statement

Glance. Hospital Strain During the COVID-19 Pandemic and Outcomes in Older Racial and Ethnic Minority Adults. *JAMA Netw Open*. Published October 15, 2024.

doi:10.1001/jamanetworkopen.2024.38563

### Data

**Data available:** No
